# Supplementary material
Source: PubMed Central journal article supplement (PMC5997265)

Figure S1, Nabhan et al

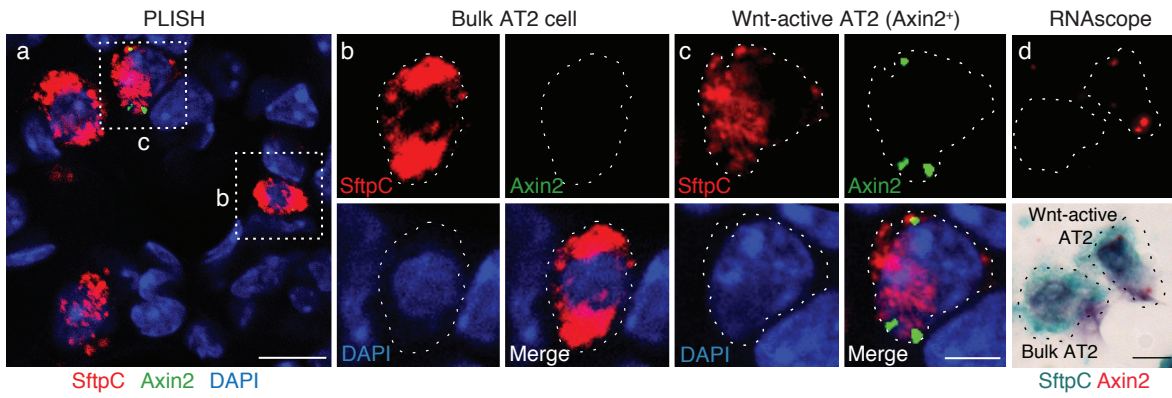

Figure S2, Nabhan et al

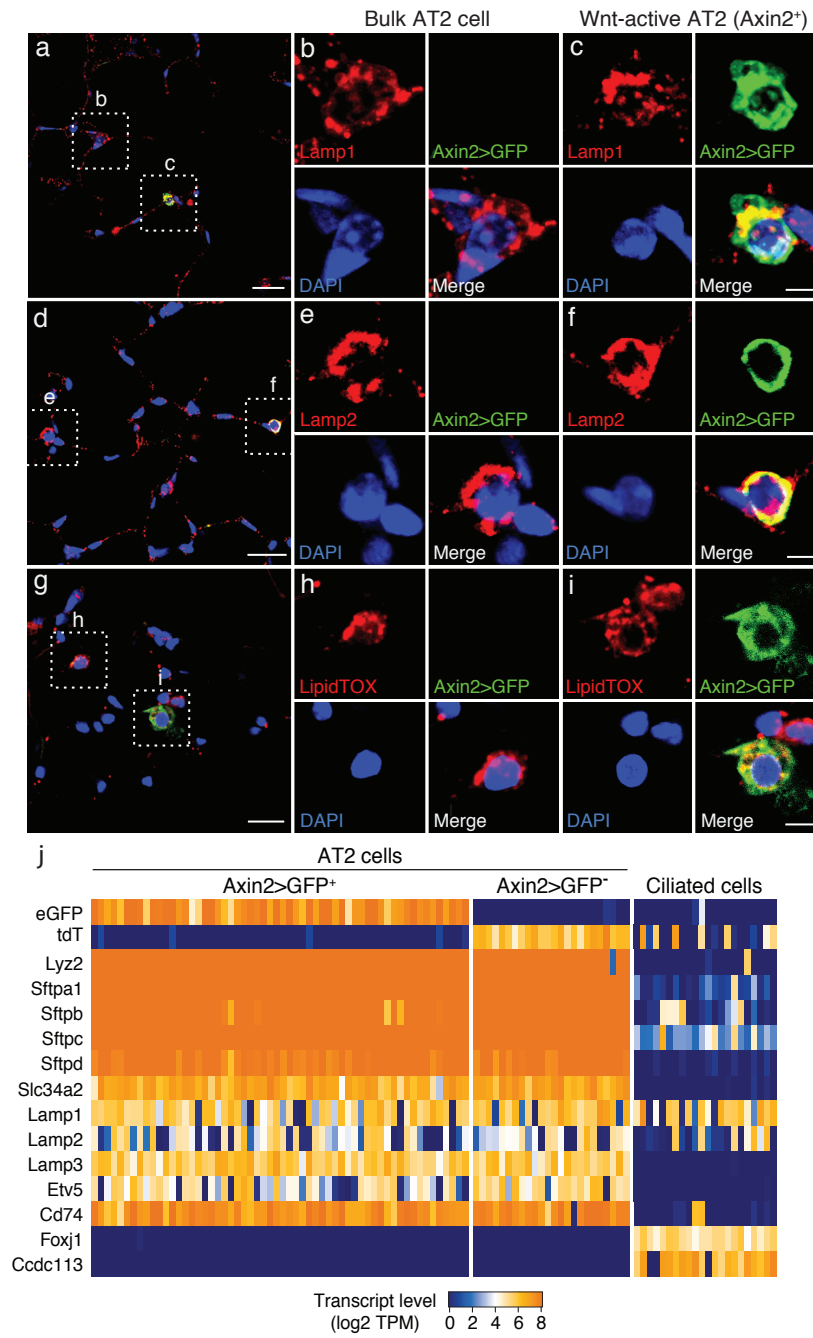

Figure S3, Nabhan et al

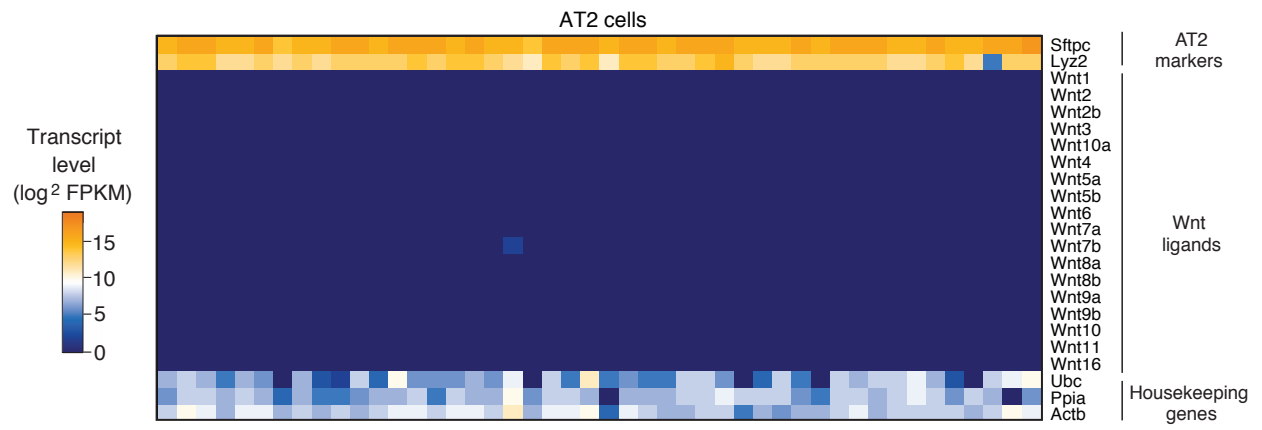

Figure S4, Nabhan et al

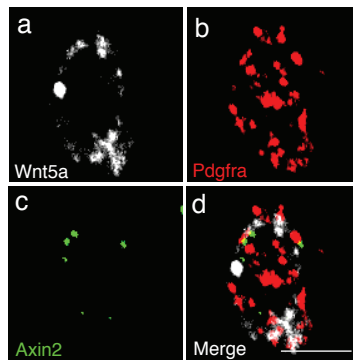

Figure S5, Nabhan et al

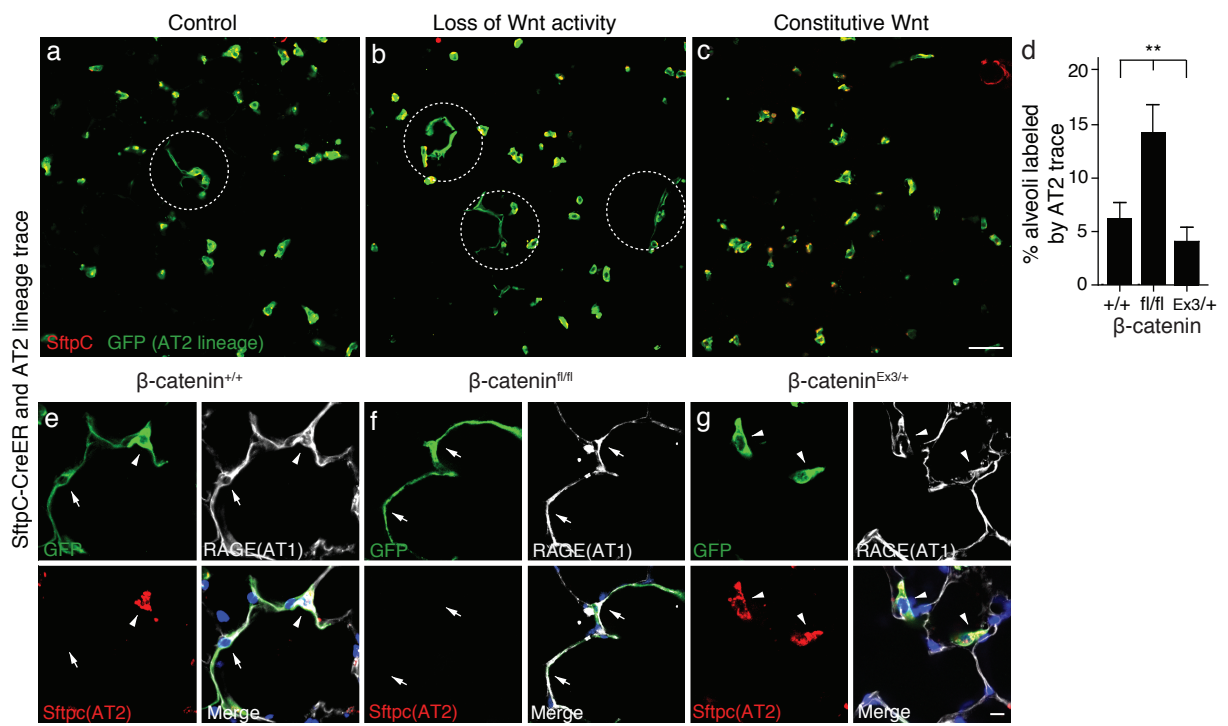

Figure S6, Nabhan et al

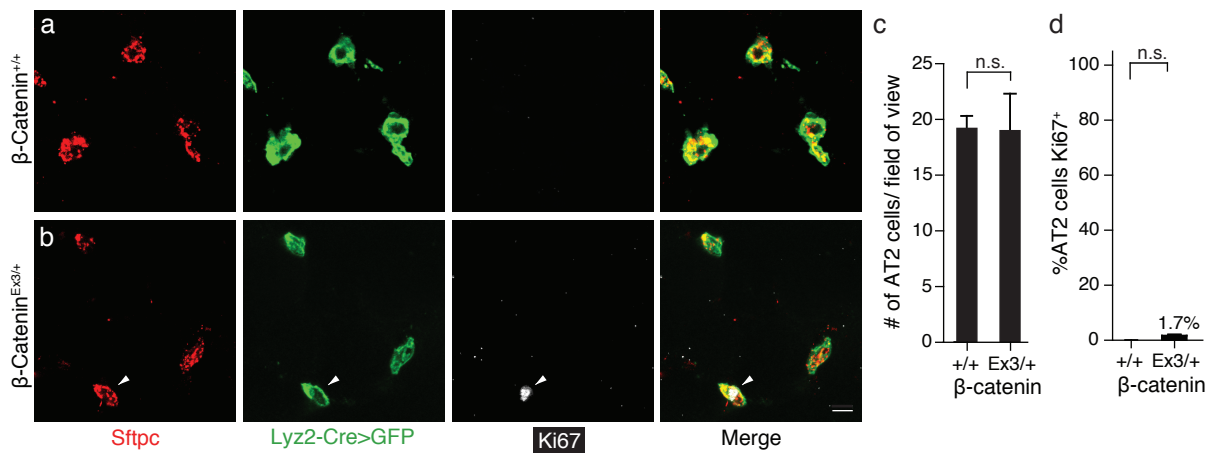

Figure S7, Nabhan et al

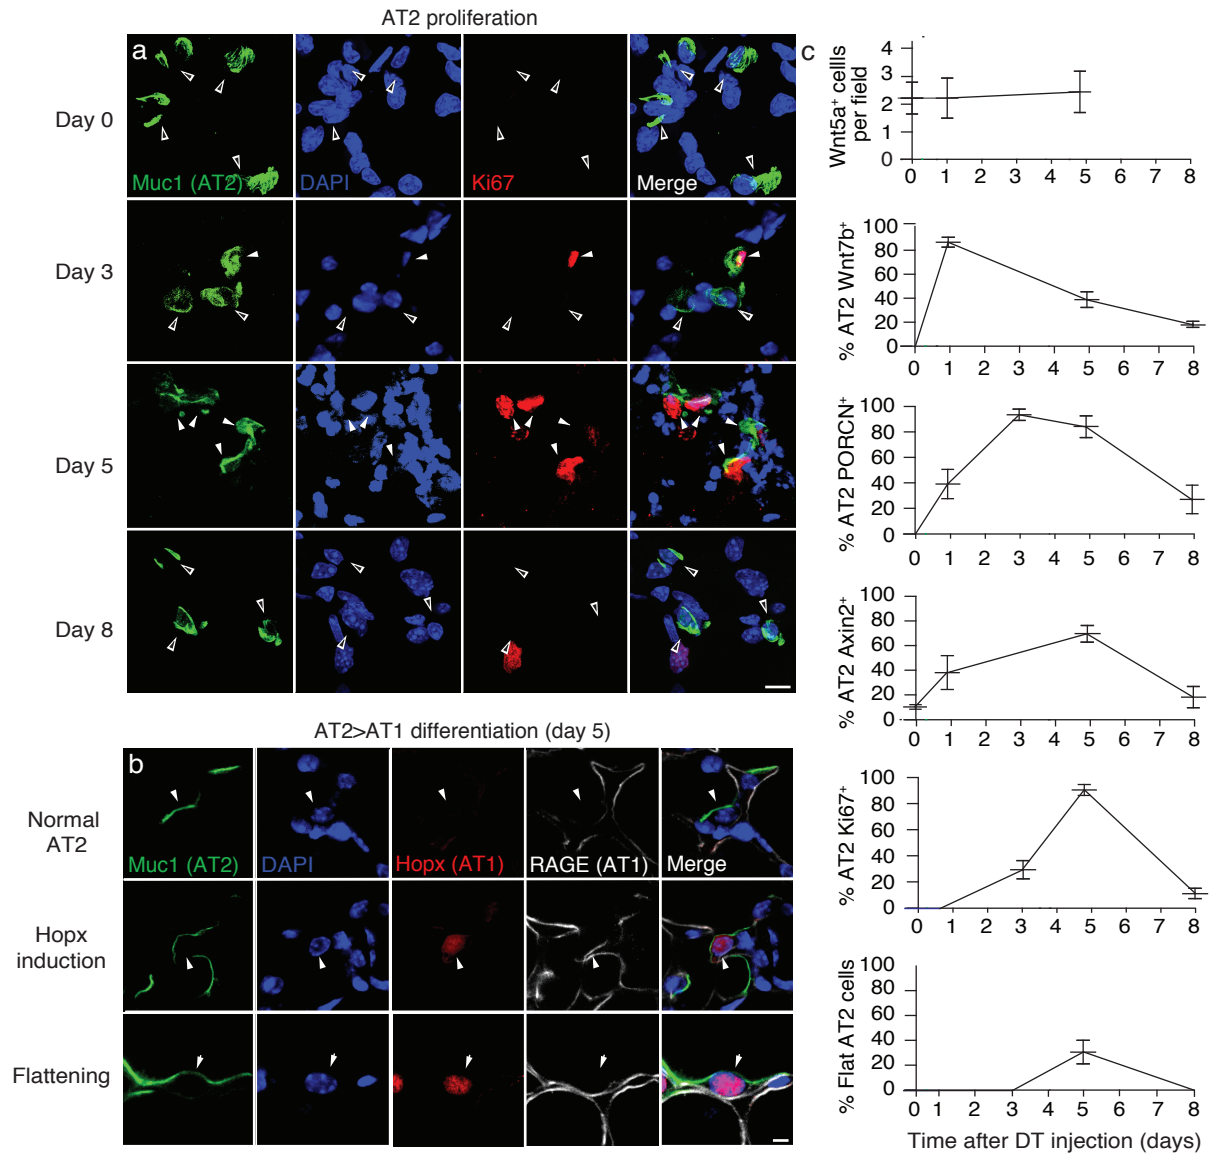

Figure S8, Nabhan et al

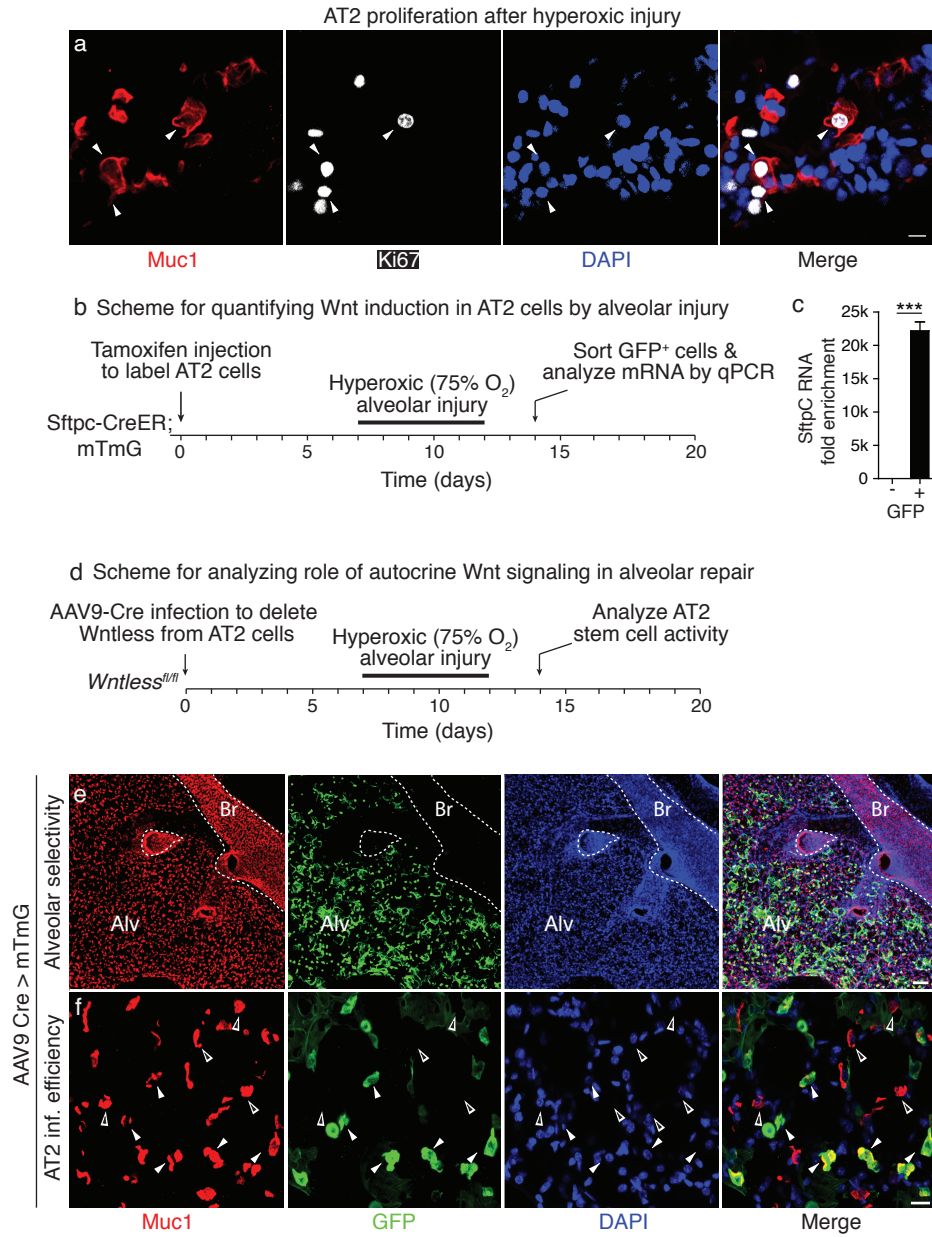



Figure S9, Nabhan et al

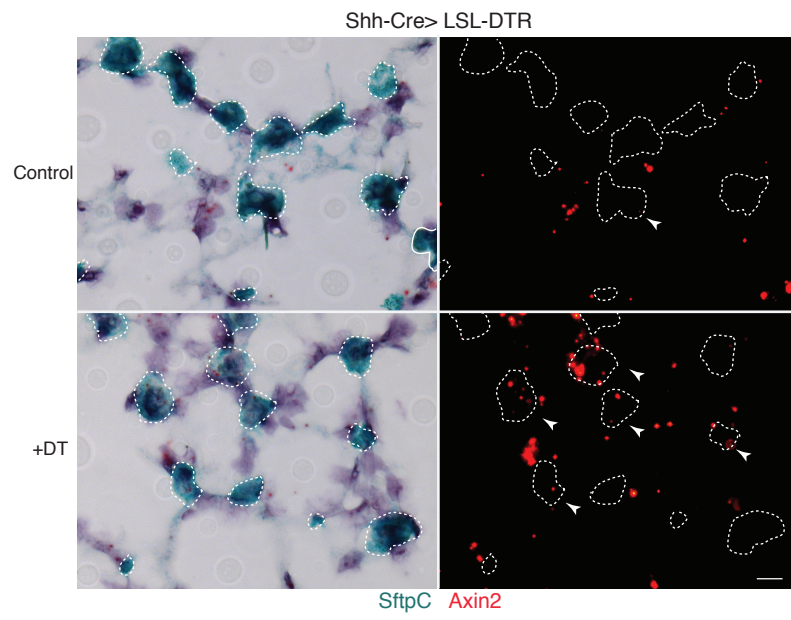

Supplement: NIHMS916477-supplement-S1_to_S9.pdf [file NIHMS916477-supplement-S1_to_S9.pdf]
